# Supplementary material for: DNA-encoded chemical libraries
Source: Springer Nature journal article supplement (doi:10.1038/s43586-021-00084-5), 2022-01-17
Supplement: 43586_2021_84_MOESM1_ESM.pdf [file 43586_2021_84_MOESM1_ESM.pdf]

## Supplementary information

---

# DNA-encoded chemical libraries

---

In the format provided by the  
authors and unedited

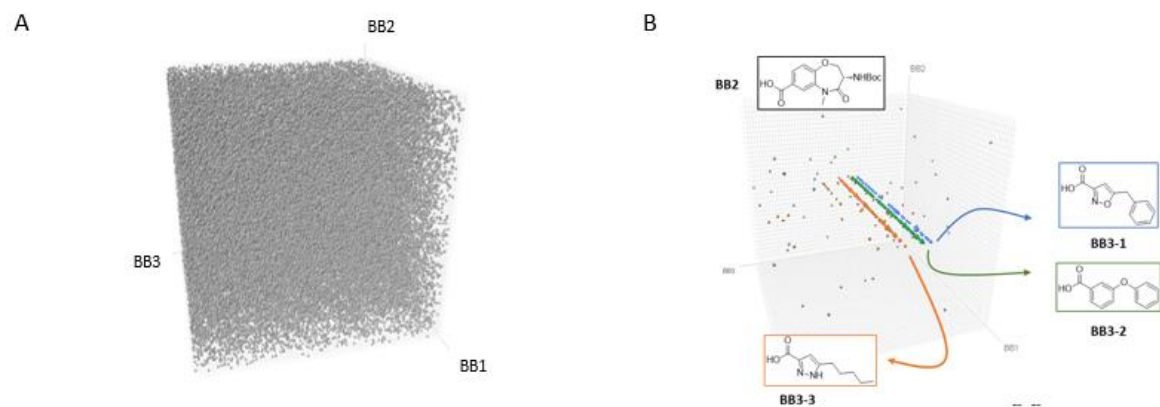

Supplementary Figure 1. Visualization of cube plot before and after removal of background signal and weakly enriched molecules.

(A) The visualized data prior to removal of library molecules with weak enrichment or enrichment against the no-target control selection. (B) The remaining visualized data, allowing for observation of potential ligand clusters.

Supplementary Table 1. Exemplary reactions on DNA-encoded substrates

| No                                | reaction                  | generic scheme                                                                       | ref |
|-----------------------------------|---------------------------|--------------------------------------------------------------------------------------|-----|
| <i>coupling reactions</i>         |                           |                                                                                      |     |
| 1.                                | amide synthesis           | 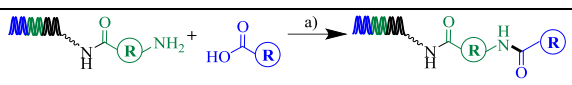   | 1,2 |
| 2.                                | reductive amination       |    | 3   |
| 3.                                | S <sub>N</sub> AR         |    | 1   |
| 4.                                | nucleophilic substitution |    | 4   |
| 5.                                | Suzuki coupling           |    | 5   |
| 6.                                | Ullmann coupling          |    | 6   |
| <i>heterocyclic chemistries</i>   |                           |                                                                                      |     |
| 7.                                | benzimidazole synthesis   |  | 3,7 |
| 8.                                | van-Leusen reaction       |  | 8   |
| 9.                                | pyrazolidinone synthesis  |  | 3,9 |
| 10.                               | Larock indole synthesis   |  | 10  |
| <i>protective group chemistry</i> |                           |                                                                                      |     |
| 11.                               | amines                    |  | 1   |
| 12.                               | carboxylic acids          |  | 3,9 |

strategies for reaction scope expansion

|     |                      |  |    |
|-----|----------------------|--|----|
| 13. | photoredox chemistry |  | 11 |
| 14. | micellar reactions   |  | 12 |
| 15. | on-resin reactions   |  | 13 |
| 16. | CPG solid phase      |  | 14 |

Reaction conditions: a) coupling reagents such as EDC, DM-MMT, HBTU; b) NaCNBH<sub>3</sub>; c,d) no catalyst, heating in aqueous solution; e,j) Pd(0)/ligands; f) Cu(I)/ligands; g,h,i) no catalyst, heating in aqueous solution; k) piperidine in water (for Fmoc), Pd/NaCNBH<sub>3</sub> (for Cbz); m) dilute aqueous NaOH; n) Iridium catalyst; o) designer surfactant or copolymer catalyst; p) various reactions shown e.g. ; q) BINOL-phosphoric acid. CPG: controlled pore glass.

Supplementary Table 2. Exemplary library designs that led to validated bioactive compounds.

| No | structure               | DECL design                                                                          | ref |
|----|-------------------------|--------------------------------------------------------------------------------------|-----|
| 1. | S <sub>n</sub> AR-DECL  | 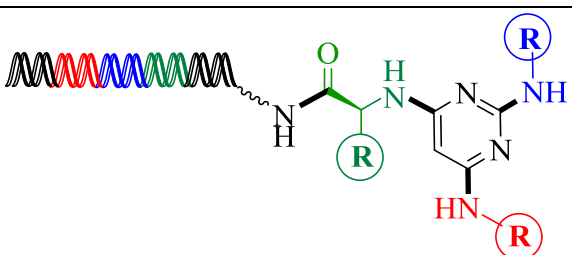   | 1   |
| 2. | indole-DECL             |    | 10  |
| 3. | capped<br>triamide-DECL |   | 15  |
| 4. | benzimidazole-<br>DECL  |  | 16  |
| 5. | biaryl-DECL             |  | 17  |

Supplementary Table 3. Published examples of DECL hit molecules before and after medicinal chemistry optimization.

| Target             | DECL hit molecule                                                                   |                                                                                                          | After Med Chem                                                                       |                                                                                                            |
|--------------------|-------------------------------------------------------------------------------------|----------------------------------------------------------------------------------------------------------|--------------------------------------------------------------------------------------|------------------------------------------------------------------------------------------------------------|
| RIP1 <sup>18</sup> | 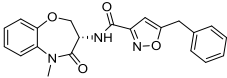   | MW = 377.4<br>cLogP = 2.31<br>hba = 7<br>hbd = 1<br>rb = 4<br>tpsa = 84.7<br>aring = 3<br>IC50 = 1.6 nM  |    | MW = 377.4<br>cLogP = 2.02<br>hba = 8<br>hbd = 2<br>rb = 4<br>tpsa = 100.2<br>aring = 3<br>IC50 = 1.0 nM   |
| DDR1 <sup>19</sup> |    | MW = 446.5<br>cLogP = 0.69<br>hba = 9<br>hbd = 2<br>rb = 5<br>tpsa = 101.6<br>aring = 3<br>IC50 = 1.5 μM |    | MW = 565.4<br>cLogP = 1.85<br>hba = 9<br>hbd = 2<br>rb = 5<br>tpsa = 111.3<br>aring = 3<br>IC50 = 0.029 μM |
| WIP1 <sup>20</sup> |   | MW = 478.1<br>cLogP = 5.2<br>hba = 6<br>hbd = 3<br>rb = 11<br>tpsa = 79.5<br>aring = 2<br>IC50 = 13 nM   |   | MW = 461.0<br>cLogP = 4.6<br>hba = 6<br>hbd = 3<br>rb = 9<br>tpsa = 83.1<br>aring = 2<br>IC50 = 6 nM       |
| SEH <sup>21</sup>  |  | MW = 517.6<br>cLogP = 2.33<br>hba = 10<br>hbd = 5<br>rb = 10<br>tpsa = 141.2<br>aring = 3<br>pIC50 = 8.1 |  | MW = 422.4<br>cLogP = 4.12<br>hba = 7<br>hbd = 3<br>rb = 8<br>tpsa = 90.4<br>aring = 2<br>IC50 = 27 pM     |
| ATX <sup>22</sup>  |  | MW = 577.7<br>cLogP = 3.25<br>hba = 9<br>hbd = 2<br>rb = 8<br>tpsa = 102.1<br>aring = 2<br>IC50 = 86 nM  |  | MW = 587.2<br>cLogP = 3.38<br>hba = 9<br>hbd = 2<br>rb = 8<br>tpsa = 85.0<br>aring = 3<br>IC50 = 55 nM     |

|                          |  |                                                                                                               |  |                                                                                                           |
|--------------------------|--|---------------------------------------------------------------------------------------------------------------|--|-----------------------------------------------------------------------------------------------------------|
| BCATm <sup>2</sup><br>3  |  | MW = 583.6<br>cLogP = 5.96<br>hba = 6<br>hbd = 2<br>rb = 6<br>tpsa = 76.0<br>aring = 4<br>pIC50 6.6           |  | MW = 538.5<br>cLogP = 4.50<br>hba = 7<br>hbd = 2<br>rb = 5<br>tpsa = 88.9<br>aring = 4<br>pIC50 7.3       |
| BRD4 <sup>24</sup>       |  | MW = 434.5<br>cLogP = 3.02<br>hba = 7<br>hbd = 2<br>rb = 5<br>tpsa = 87.5<br>aring = 3<br>pIC50 = 6.6         |  | MW = 440.5<br>cLogP = 1.89<br>hba = 8<br>hbd = 0<br>rb = 8<br>tpsa = 70.8<br>aring = 3<br>pIC50 = 7.9     |
| ATAD2 <sup>2</sup><br>5  |  | MW = 575.1<br>cLogP = 5.55<br>hba = 9<br>hbd = 3<br>rb = 10<br>tpsa = 126.5<br>aring = 4<br>IC50 not reported |  | MW = 654.3<br>cLogP = 6.20<br>hba = 8<br>hbd = 4<br>rb = 13<br>tpsa = 125.3<br>aring = 4<br>IC50 = 166 nM |
| OXA-<br>48 <sup>26</sup> |  | MW = 542.6<br>cLogP = 1.26<br>hba = 12<br>hbd = 2<br>rb = 7<br>tpsa = 127.3<br>aring = 2<br>Ki = 0.9 μM       |  | MW = 412.5<br>cLogP = 1.81<br>hba = 9<br>hbd = 1<br>rb = 5<br>tpsa = 94.9<br>aring = 2<br>Ki = 0.53 μM    |
| PI3Ka <sup>17</sup>      |  | MW = 632.7<br>cLogP = 4.34<br>hba = 10<br>hbd = 3<br>rb = 10<br>tpsa = 135.2<br>aring = 5<br>IC50 6.5 nM      |  | MW = 511.6<br>cLogP = 2.56<br>hba = 10<br>hbd = 3<br>rb = 6<br>tpsa = 143.4<br>aring = 4<br>IC50 10 nM    |
| Mcl-1 <sup>27</sup>      |  | MW = 673.0<br>cLogP = 3.96<br>hba = 9<br>hbd = 4<br>rb = 12<br>tpsa = 133.6<br>aring = 3<br>IC50 = 2 μM       |  | MW = 826.5<br>cLogP = 4.68<br>hba = 11<br>hbd = 3<br>rb = 8<br>tpsa = 145.0<br>aring = 4<br>IC50 < 3 nM   |

|                      |                                                                                     |                                                                                                          |                                                                                      |                                                                                                          |
|----------------------|-------------------------------------------------------------------------------------|----------------------------------------------------------------------------------------------------------|--------------------------------------------------------------------------------------|----------------------------------------------------------------------------------------------------------|
| GSK-3b <sup>28</sup> | 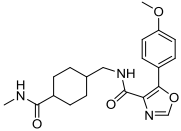   | MW = 371.4<br>cLogP = 1.54<br>hba = 7<br>hbd = 2<br>rb = 5<br>tpsa = 93.5<br>aring = 2<br>pIC50 = 6.5    |    | MW = 357.8<br>cLogP = 2.03<br>hba = 6<br>hbd = 1<br>rb = 5<br>tpsa = 77.3<br>aring = 3<br>pIC50 = 7.5    |
| SIRT1 <sup>29</sup>  |    | MW = 486.6<br>cLogP = 1.92<br>hba = 9<br>hbd = 3<br>rb = 8<br>tpsa = 129<br>aring = 3<br>IC50 = 3.6 nM   |    | MW = 389.5<br>cLogP = 2.65<br>hba = 7<br>hbd = 2<br>rb = 5<br>tpsa = 101.2<br>aring = 2<br>IC50 = 15 nM  |
| InhA <sup>30</sup>   |    | MW = 437.5<br>cLogP = 1.64<br>hba = 9<br>hbd = 2<br>rb = 7<br>tpsa = 109.5<br>aring = 3<br>IC50 = 34 nM  |    | MW = 423.5<br>cLogP = 1.4<br>hba = 9<br>hbd = 2<br>rb = 7<br>tpsa = 123.5<br>aring = 3<br>IC50 = 4 nM    |
| PAD4 <sup>31</sup>   |   | MW = 387.5<br>cLogP = 2.72<br>hba = 6<br>hbd = 1<br>rb = 3<br>tpsa = 69.1<br>aring = 4<br>IC50 = 3.2 μM  |   | MW = 473.6<br>cLogP = 2.19<br>hba = 8<br>hbd = 2<br>rb = 6<br>tpsa = 98.5<br>aring = 4<br>IC50 = 50 nM   |
| TAK1 <sup>32</sup>   |  | MW = 433.5<br>cLogP = 2.37<br>hba = 7<br>hbd = 2<br>rb = 10<br>tpsa = 91.5<br>aring = 2<br>IC50 = 1.3 μM |  | MW = 539.5<br>cLogP = 2.48<br>hba = 10<br>hbd = 3<br>rb = 11<br>tpsa = 147.5<br>aring = 3<br>IC50 = 2 nM |

MW = molecular weight (g/mol)

cLogP = calculated logarithm of its partition coefficient between n-octanol and water

hba = number hydrogen bond acceptors

hbd = number hydrogen bond doners

rb = number rotatable bonds

tpsa = topological polar surface area (angstroms squared)

aring = number aromatic rings

IC50 = Half-maximal inhibitory concentration



Supplementary Table 4. DNA damage reactions that limit the reaction scope for DECL design

| No | type                           | reaction                                                                            | reaction conditions/reagents          |
|----|--------------------------------|-------------------------------------------------------------------------------------|---------------------------------------|
| 1. | depurination                   | 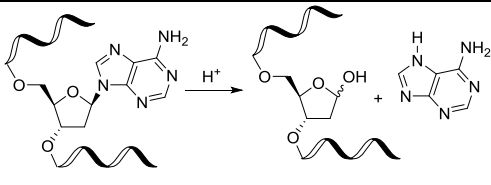   | pH < 4, Lewis/Brønsted acids and heat |
| 2. | fragmentation                  |   | pH > 14 and heat                      |
| 3. | deamination <sup>a</sup>       |    | metal ions, heating                   |
| 4. | 2+2 cycloaddition <sup>b</sup> |  | irradiation                           |
| 5. | oxopurine formation            |  | oxidants, radicals                    |
| 6. | nucleophile addition           |  | hydrazines, hydroxylamines            |

<sup>a</sup> Cytosine most susceptible, but purines may deaminate, too; <sup>b</sup> at wavelengths of ca 260 nm, catalysts may facilitate cycloaddition at higher wavelengths (see literature on photodynamic therapy)

## References

1. Clark, M. A. *et al.* Design, synthesis and selection of DNA-encoded small-molecule libraries. *Nature Chemical Biology* **5**, 647–654 (2009).
2. Mannocci, L. *et al.* High-throughput sequencing allows the identification of binding molecules isolated from DNA-encoded chemical libraries. *Proc. Natl. Acad. Sci. U.S.A.* **105**, 17670–17675 (2008).
3. Satz, A. L. *et al.* DNA Compatible Multistep Synthesis and Applications to DNA Encoded Libraries. *Bioconjugate Chem.* **26**, 1623–1632 (2015).
4. Wrenn, S. J., Weisinger, R. M., Halpin, D. R. & Harbury, P. B. Synthetic Ligands Discovered by in Vitro Selection. *J. Am. Chem. Soc.* **129**, 13137–13143 (2007).
5. Ding, Y. & Clark, M. A. Robust Suzuki–Miyaura Cross-Coupling on DNA-Linked Substrates. *ACS Comb. Sci.* **17**, 1–4 (2015).
6. Ruff, Y. & Berst, F. Efficient copper-catalyzed amination of DNA-conjugated aryl iodides under mild aqueous conditions. *Med. Chem. Commun.* **9**, 1188–1193 (2018).
7. Ding, Y. *et al.* Development and Synthesis of DNA-Encoded Benzimidazole Library. *ACS Comb. Sci.* **20**, 251–255 (2018).
8. Geigle, S. N., Petersen, A. C. & Satz, A. L. Development of DNA-Compatible Van Leusen Three-Component Imidazole Synthesis. *Org. Lett.* **21**, 9001–9004 (2019).
9. Götte, K., Chines, S. & Brunschweiler, A. Reaction development for DNA-encoded library technology: From evolution to revolution? *Tetrahedron Letters* **61**, 151889 (2020).
10. Kazmierski, W. M. *et al.* DNA Encoded Library Technology-based discovery, lead optimization and prodrug strategy toward structurally-unique indoleamine 2,3-dioxygenase (IDO1) inhibitors. *J. Med. Chem.* (2020) doi:10.1021/acs.jmedchem.9b01799.

11. Phelan, J. P. *et al.* Open-Air Alkylation Reactions in Photoredox-Catalyzed DNA-Encoded Library Synthesis. *J. Am. Chem. Soc.* **141**, 3723–3732 (2019).
12. Škopić, M. K. *et al.* Micellar Brønsted Acid Mediated Synthesis of DNA-Tagged Heterocycles. *J. Am. Chem. Soc.* **141**, 10546–10555 (2019).
13. Flood, D. T. *et al.* Expanding Reactivity in DNA-Encoded Library Synthesis via Reversible Binding of DNA to an Inert Quaternary Ammonium Support. *J. Am. Chem. Soc.* **141**, 9998–10006 (2019).
14. Potowski, M. *et al.* Screening of metal ions and organocatalysts on solid support-coupled DNA oligonucleotides guides design of DNA-encoded reactions. *Chem. Sci.* **10**, 10481–10492 (2019).
15. Ahn, S. *et al.* Allosteric ‘beta-blocker’ isolated from a DNA-encoded small molecule library. *Proc. Natl. Acad. Sci. U.S.A.* **114**, 1708–1713 (2017).
16. Wood, E. R. *et al.* The Role of Phosphodiesterase 12 (PDE12) as a Negative Regulator of the Innate Immune Response and the Discovery of Antiviral Inhibitors. *J Biol Chem* **290**, 19681–19696 (2015).
17. Yang, H. *et al.* Discovery of a Potent Class of PI3K $\alpha$  Inhibitors with Unique Binding Mode via Encoded Library Technology (ELT). *ACS Med. Chem. Lett.* **6**, 531–536 (2015).
18. Harris, P. A. *et al.* Discovery of a First-in-Class Receptor Interacting Protein 1 (RIP1) Kinase Specific Clinical Candidate (GSK2982772) for the Treatment of Inflammatory Diseases. *J. Med. Chem.* **60**, 1247–1261 (2017).
19. Richter, H. *et al.* DNA-Encoded Library-Derived DDR1 Inhibitor Prevents Fibrosis and Renal Function Loss in a Genetic Mouse Model of Alport Syndrome. *ACS Chem. Biol.* **14**, 37–49 (2019).
20. Gilmartin, A. G. *et al.* Allosteric Wip1 phosphatase inhibition through flap-subdomain interaction. *Nat. Chem. Biol.* **10**, 181–187 (2014).
21. Belyanskaya, S. L., Ding, Y., Callahan, J. F., Lazaar, A. L. & Israel, D. I. Discovering Drugs with DNA-Encoded Library Technology: From Concept to Clinic with an Inhibitor of Soluble Epoxide Hydrolase. *Chembiochem* **18**, 837–842 (2017).

22. Novel Autotaxin Inhibitor for the Treatment of Idiopathic Pulmonary Fibrosis: A Clinical Candidate Discovered Using DNA-Encoded Chemistry | Journal of Medicinal Chemistry.  
<https://pubs.acs.org/doi/abs/10.1021/acs.jmedchem.0c00688>.
23. Deng, H. *et al.* Discovery and Optimization of Potent, Selective, and in Vivo Efficacious 2-Aryl Benzimidazole BCATm Inhibitors. *ACS Med. Chem. Lett.* **7**, 379–384 (2016).
24. Wellaway, C. R. *et al.* Discovery of a Bromodomain and Extraterminal Inhibitor with a Low Predicted Human Dose through Synergistic Use of Encoded Library Technology and Fragment Screening. *J. Med. Chem.* **63**, 714–746 (2020).
25. Fernández-Montalván, A. E. *et al.* Isoform-Selective ATAD2 Chemical Probe with Novel Chemical Structure and Unusual Mode of Action. *ACS Chem. Biol.* **12**, 2730–2736 (2017).
26. Harris, P. A. *et al.* DNA-Encoded Library Screening Identifies Benzo[b][1,4]oxazepin-4-ones as Highly Potent and Monoselective Receptor Interacting Protein 1 Kinase Inhibitors. *J. Med. Chem.* **59**, 2163–2178 (2016).
27. Johannes, J. W. *et al.* Structure Based Design of Non-Natural Peptidic Macrocyclic Mcl-1 Inhibitors. *ACS Med Chem Lett* **8**, 239–244 (2016).
28. Gentile, G. *et al.* 5-Aryl-4-carboxamide-1,3-oxazoles: Potent and selective GSK-3 inhibitors. *Bioorganic & Medicinal Chemistry Letters* **22**, 1989–1994 (2012).
29. Disch, J. S. *et al.* Discovery of thieno[3,2-d]pyrimidine-6-carboxamides as potent inhibitors of SIRT1, SIRT2, and SIRT3. *J Med Chem* **56**, 3666–3679 (2013).
30. Soutter, H. H. *et al.* Discovery of cofactor-specific, bactericidal Mycobacterium tuberculosis InhA inhibitors using DNA-encoded library technology. *Proc. Natl. Acad. Sci. U.S.A.* **113**, E7880–E7889 (2016).
31. Lewis, H. D. *et al.* Inhibition of PAD4 activity is sufficient to disrupt mouse and human NET formation. *Nat Chem Biol* **11**, 189–191 (2015).

32. Veerman, J. J. N. *et al.* Discovery of 2,4-1H-Imidazole Carboxamides as Potent and Selective TAK1 Inhibitors. *ACS Med. Chem. Lett.* **12**, 555–562 (2021).
